# Supplementary material for: Growth Regulators Improve Outcrossing Rate of Diverse Rice Cytoplasmic Male Sterile Lines through Affecting Floral Traits
Source: MDPI journal article supplement (doi:10.3390/plants11101291), 2022-05-12
Supplement: s1 [file s1]

| CMS Lines  | Untreated control (T1)                                                              | Combination of GA <sub>3</sub> + IAA + NAA (T3)                                      |
|------------|-------------------------------------------------------------------------------------|--------------------------------------------------------------------------------------|
| L1 (A1×B1) |    |    |
| L2 (A2×B2) |    |    |
| L3 (A3×B3) |   |   |
| L4 (A4×B4) |  |  |
| L5 (A5×B5) |  |  |

Figure S1. Impact of growth regulators on rice stigma compared to untreated control, scale bar 2 mm.
